# Supplementary material
Source: PubMed Central journal article supplement (PMC2735360)

# Supplementary 1

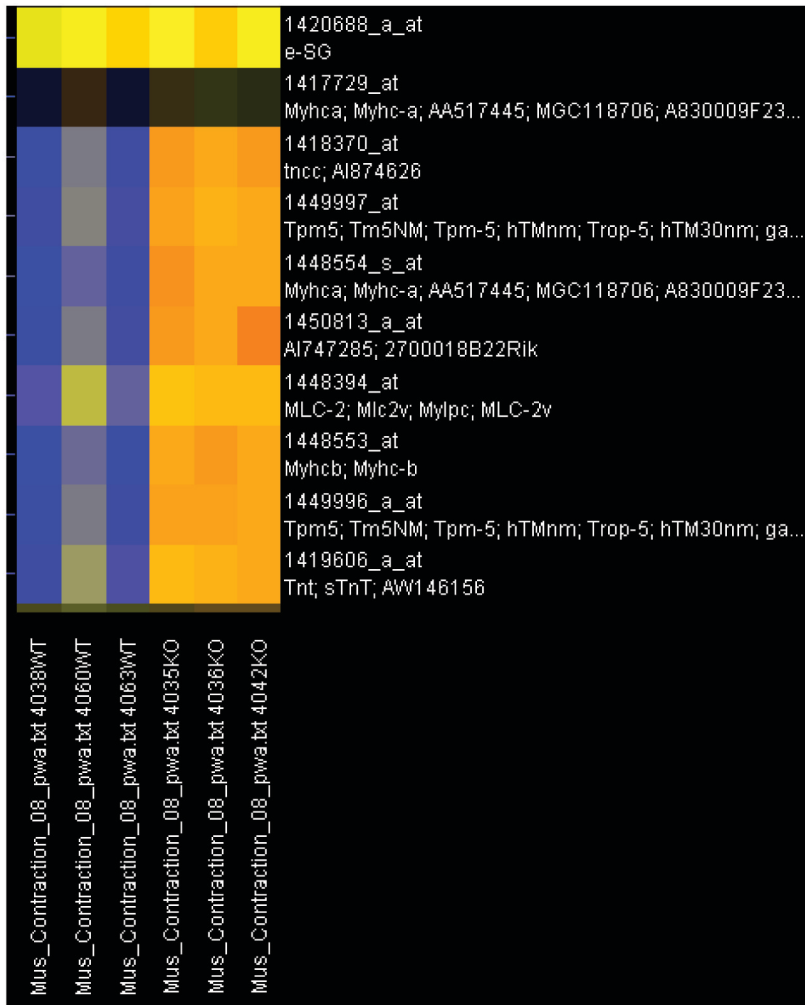

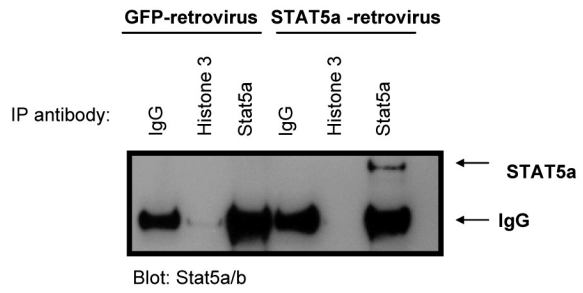

Supplement: fj.08-128215_1.pdf [file fj.08-128215_1.pdf]
